# Supplementary material for: Ab initio identification of putative human transcription factor binding sites by comparative genomics
Source: Springer Nature journal article supplement (doi:10.1186/1471-2105-6-110), 2005-05-02

# all motif – ann genes – PAM1

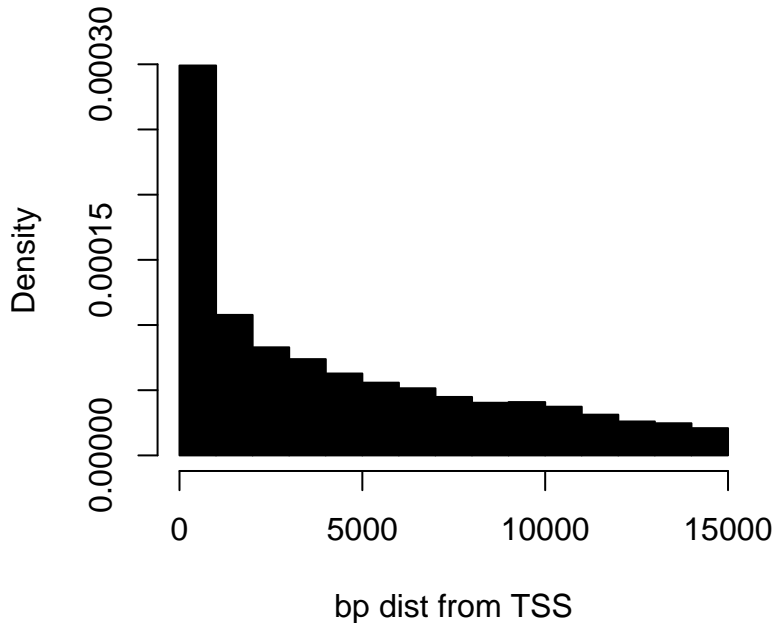

Supplement: 12859_2004_435_MOESM4_ESM.pdf [file 12859_2004_435_MOESM4_ESM.pdf]
